# Supplementary material
Source: Springer Nature journal article supplement (https://www.springermedizin.de/resource/supplementary/13023_2013_558_MOESM6_ESM.pdf/9642778)

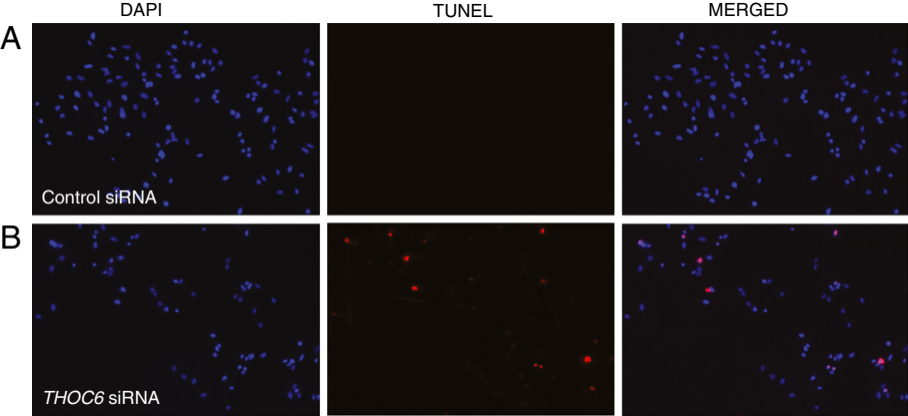

Supplement: MOESM6 [file 9642778]
